# Supplementary material for: Neuronal Pnn Deficiency Increases Oxidative Stress and Exacerbates Cerebral Ischemia/Reperfusion Injury in Mice
Source: MDPI journal article supplement (doi:10.3390/antiox11030466), 2022-02-26
Supplement: s1 [file s1]

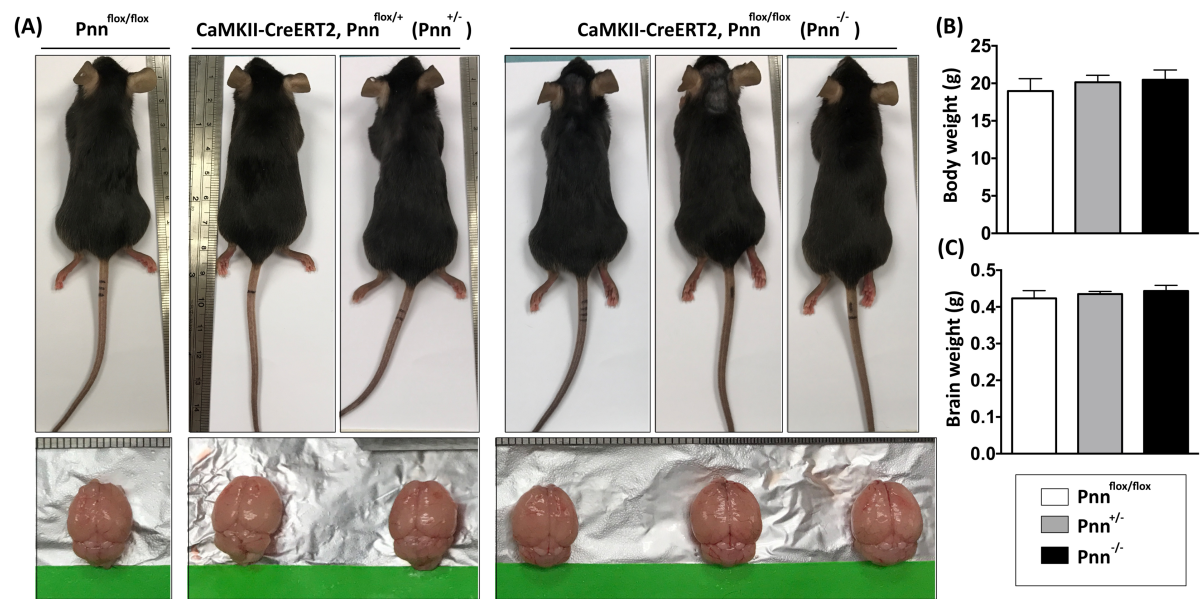

**Figure S1. Gross observation of mice with neuronal Pnn depletion**

Four weeks after injection of tamoxifen (10-week-old mice), animals were sacrificed for brain tissue collection. The body size (A), body weight (B), and brain weight (C) showed no difference among  $Pnn^{flox/flox}$ ,  $Pnn^{+/-}$ , and  $Pnn^{-/-}$  groups.  $n=6$  for each group.
